# Supplementary material for: Long-Term Outcomes of COVID-19 in Hospitalized Type 2 Diabetes Mellitus Patients
Source: MDPI journal article supplement (doi:10.3390/biomedicines12020467), 2024-02-19
Supplement: s1 [file s1]

**Supplementary Table S1.** Comparison of discharged and deceased hospitalized patients with COVID-19-associated pneumonia and T2D

| Parameter                                      | Discharged, n=330<br>Median (Q1; Q3) or n (%) | Deceased, n=51<br>Median (Q1; Q3) or n (%) | P                   |
|------------------------------------------------|-----------------------------------------------|--------------------------------------------|---------------------|
| Gender, m/f                                    | 110 (33.33%) / 220 (66.67%)                   | 16 (31.37%) / 35 (68.63%)                  | ●●●●●●              |
| Age, years                                     | 65 [64; 67]                                   | 71 [69;74]                                 | ✱0.0001             |
| Duration of disease, days                      | 12 [11; 12]                                   | 10,5 [6; 14]                               | 0.1094              |
| Outcomes (survivals/deceased)                  | 16 [15; 16]                                   | 15 [12; 22]                                | 0.9644              |
| <i>COVID-19 related symptoms at admission:</i> |                                               |                                            |                     |
| Severity (moderate/severe)                     | 288 (87.27%)/42 (12.73%)                      | 10 (25.49%)/41 (74.51%)                    | < 0.0001            |
| Dyspnea at rest                                | 108 (32.72%)                                  | 13 (25.49%)                                | 0.3024              |
| Dyspnea at exertion                            | 214 (64.85%)                                  | 38 (74.51%)                                | 0.1749              |
| Incidences of aches                            | 196 (59.39%)                                  | 40 (78.43%)                                | 0.0101              |
| Weakness                                       | 312 (94.55%)                                  | 50 (98.04%)                                | 0.4714 <sup>‡</sup> |
| <i>Events in hospital</i>                      |                                               |                                            |                     |
| RDS                                            | 3 (0.91%)                                     | 40 (78.43%)                                | ✱0.0001             |
| Lung tissue damage on CT, %                    | 40 [40; 44]                                   | 49 [40; 60]                                | 0.0660              |
| O <sub>2</sub> -dependent                      | 12 (3.64%)                                    | 17 (33.33%)                                | ✱0.0001             |
| Noninvasive ventilation                        | 4 (1.21%)                                     | 10 (19.61%)                                | ✱0.0001             |
| Mechanical intubation                          | 5 (1.52%)                                     | 30 (58.82%)                                | ✱0.0001             |
| <i>Relevant concomitant diseases</i>           |                                               |                                            |                     |
| Arterial hypertension                          | 264 (80.0%)                                   | 42 (82.35%)                                | 0.6952              |
| Chronic kidney disease                         | 47 (14.24%)                                   | 13 (25.49%)                                | 0.0413              |
| Coronary heart disease                         | 70 (21.21%)                                   | 16 (31.37%)                                | 0.1069              |
| MI in the past                                 | 31 (9.39%)                                    | 4 (7.84%)                                  | 0.7222              |
| Congestive heart failure                       | 62 (18.79%)                                   | 11 (21.57%)                                | 0.6391              |
| Stroke                                         | 17 (5.15%)                                    | 3 (5.88%)                                  | 0.8282              |
| Valve replacement                              | 3 (0.91%)                                     | 1 (1.96%)                                  | 0.4928              |
| COPD                                           | 5 (1.52%)                                     | 1 (1.96%)                                  | 0.8119              |
| Obesity                                        | 13 (3.94%)                                    | 5 (9.80%)                                  | 0.0670              |
| The Charlson comorbidity index                 | 4 [4; 4]                                      | 6 [5; 7]                                   | 0.0001              |
| <i>Laboratory parameters:</i>                  |                                               |                                            |                     |
| Hematocrit, %                                  | 38.4 [37.5; 39.38]                            | 39.4 [38.1; 41.66]                         | 0.3208              |
| Hemoglobin, g/l                                | 130 [128; 132]                                | 134 [124; 139.7]                           | 0.2593              |
| Neutrophils, *10 <sup>9</sup> /l               | 4.25 [3.85; 4.5]                              | 8.4 [6.21; 12.29]                          | ✱0.0001             |
| Lymphocytes, *10 <sup>9</sup> /l               | 1.11 [0.99; 1.2]                              | 0.924 [0.76; 1.13]                         | 0.0363              |
| Monocytes, *10 <sup>9</sup> /l                 | 0.3455 [0.3; 0.4]                             | 0.3975 [0.34;0.47]                         | 0.3932              |
| Platelets, *10 <sup>9</sup> /l                 | 197 [186; 210]                                | 162 [144.34; 191.66]                       | 0.0161              |
| ESR, mm/h                                      | 35 [31; 37]                                   | 39 [31,34; 46,66]                          | 0.2391              |
| CRP, mg/l                                      | 39 [39.93; 48]                                | 75.5 [45.61; 83.25]                        | 0.0012              |
| Procalcitonin, ng/l                            | 0.13 [0.11; 0.15]                             | 0.67 [0.19; 1.3]                           | 0.0001              |
| Albumin, g/l                                   | 40.7 [40.12; 41.18]                           | 38 [36.85; 39.67]                          | 0.0031              |
| Total bilirubin, mcmol/l                       | 7.9 [7.5; 8.5]                                | 9.3 [7.6; 11.8]                            | 0.1161              |
| AST, U/l                                       | 26.8 [24.8; 28.8]                             | 40.95 [32.6; 44.98]                        | ✱0.0001             |
| ALT, U/l                                       | 28.2 [26.32; 29.48]                           | 26.9 [24.06; 32.94]                        | 0.5266              |
| Ferritin, ng/mL                                | 354.06 [306.9; 419.3]                         | 500 [416.6; 500]                           | 0.0197              |

|                            |                      |                      |               |
|----------------------------|----------------------|----------------------|---------------|
| Glucose, mmol/l            | 9.0 [8.4; 9.9]       | 11.55 [9.62; 14.43]  | <b>0.0102</b> |
| Lactate, mmol/l            | 3.05 [2.8; 3.3]      | 2.55 [1.8; 2.9]      | 0,0753        |
| CK, U/l                    | 105 [93.6; 123]      | 174 [119.4; 266.9]   | <b>0,0352</b> |
| Alkaline phosphatase, U/l  | 171.7 [163.3; 182.1] | 160.5 [139.8; 188.7] | 0.4048        |
| Urea, mmol/l               | 6.79 [6.4; 7.2]      | 9.3 [7.5; 10.9]      | <b>0.0001</b> |
| GFR, ml/min/m <sup>2</sup> | 63 [61.5; 66]        | 52 [43.3; 59.8]      | <b>0.0004</b> |
| D-Dimer, ng/ml             | 308[259.8; 356]      | 513 [216.6; 1130.9]  | <b>0.0587</b> |
| INR                        | 1.04 [1.03; 1.06]    | 1.06 [1.02; 1.09]    | 0.3705        |
| PTT, sec                   | 13.9 [13.7; 14.1]    | 14.4[13.7; 14.7]     | 0.1607        |
| Sodium, mmol/l             | 142 [141; 142]       | 141 [139.8; 142]     | <b>0.0146</b> |
| Potassium, mmol/l          | 4.3 [4.2; 4.3]       | 4.2 [4.0; 4.5]       | 0,8962        |
| IL-6, pg/mL                | 8.08 [4.26; 11.85]   | 27.06 [6.43; 187.35] | <b>0.0086</b> |

<sup>1</sup> P.s.: † - Chi-quadrade test with Yates correction, ALT – alanine aminotransferase, AST – aspartate aminotransferase, CK – creatine kinase, COPD - chronic obstructive pulmonary disease, CRP - C-reactive protein, CT - computer tomography, ESR – erythrocytes sedimentation rate, GFR - glomerular filtration rate, IL-6 – interleukin-6, INR – international normalization ratio, MI – myocardial infarction, PTT – partial thromboplastin, RDS - respiratory distress syndrome, T2D - type 2 diabetes mellitus.

**Supplementary Table S2.** Univariant analysis of mortality risk factors in hospitalized patients with COVID-19-associated pneumonia and T2D

| Indicator                        | Coefficient | STD. Error | ODDS RATIO | 95% CI         | P                 |
|----------------------------------|-------------|------------|------------|----------------|-------------------|
| Age                              | 0,07978     | 0,01709    | 1,0831     | 1,0474; 1,1199 | <b>&lt;0,0001</b> |
| Condition                        | 3,0285      | 0,4064     | 20,6667    | 9,3187;45,8339 | <b>&lt;0,0001</b> |
| Albumin, g/l                     | -0,1261     | 0,03884    | 0,8815     | 0,8479;0,9164  | <b>0,0012</b>     |
| Urea, mmol/l                     | 0,1177      | 0,03384    | 1,1249     | 1,0875;1,1636  | <b>0,0005</b>     |
| AST, U/l                         | 0,0093      | 0,0046     | 1,0093     | 1,0047;1,0139  | 0,0433            |
| The Charlson comorbidity index   | 0,5775      | 0,1013     | 1,7816     | 1,6099;1,8715  | <b>&lt;0,0001</b> |
| Creatine phosphokinase, U/l      | 0,0005      | 0,0002     | 1,0005     | 1,0003;1,0007  | <b>0,0253</b>     |
| CRP, mg/l                        | 0,0169      | 0,0056     | 1,017      | 1,0113;1,0228  | <b>0,0024</b>     |
| Ferritin, ng/ mL                 | 0,0034      | 0,0016     | 1,0034     | 1,0002;1,0050  | <b>0,0387</b>     |
| Procalcitonin, ng/l              | 0,1299      | 0,0572     | 1,1387     | 1,0754;1,2058  | <b>0,0232</b>     |
| GFR, ml/min/m <sup>2</sup>       | -0,03795    | 0,008945   | 0,9628     | 0,9542;0,9714  | <b>&lt;0,0001</b> |
| Glucose, mmol/l                  | 0,0960      | 0,0260     | 1,1008     | 1,0725;1,1298  | <b>0,0002</b>     |
| IL-6, pg/mL                      | 0,0040      | 0,0022     | 1,0040     | 0,9998;1,0083  | 0,0627            |
| Lymphocytes, *10 <sup>9</sup> /l | -0,2549     | 0,3082     | 0,7750     | 0,4236;1,4180  | 0,4083            |
| Neutrophils,*10 <sup>9</sup> /l  | 0,1062      | 0,0322     | 1,1121     | 1,0768;1,1484  | <b>0,0010</b>     |
| Platelets, *10 <sup>9</sup> /l   | -0,0055     | 0,002544   | 0,9944     | 0,9895;0,9994  | <b>0,0285</b>     |
| Sodium, mmol/l                   | -0,01236    | 0,01389    | 0,9877     | 0,9612;1,0150  | 0,3734            |

P.s.: AST – aspartate aminotransferase, CRP – C-reactive protein, GFR - glomerular filtration rate, IL-6 – interleukin 6.

**Supplementary Table S3.** Results of the logit model estimation for assessing the reliability of confounders

| Confounding variable | β-coefficient± SE | P-value of β      |
|----------------------|-------------------|-------------------|
| Intercept            | -4.7252±0.3348    | <b>&lt;0.0001</b> |
| Gender, male         | -0.344±0.1246     | 0.0057            |
| Age, years           | 0.0377±0.0053     | <b>&lt;0.0001</b> |

|                       |                    |           |
|-----------------------|--------------------|-----------|
| Arterial hypertension | $1.4422 \pm 0.141$ | $<0.0001$ |
|-----------------------|--------------------|-----------|

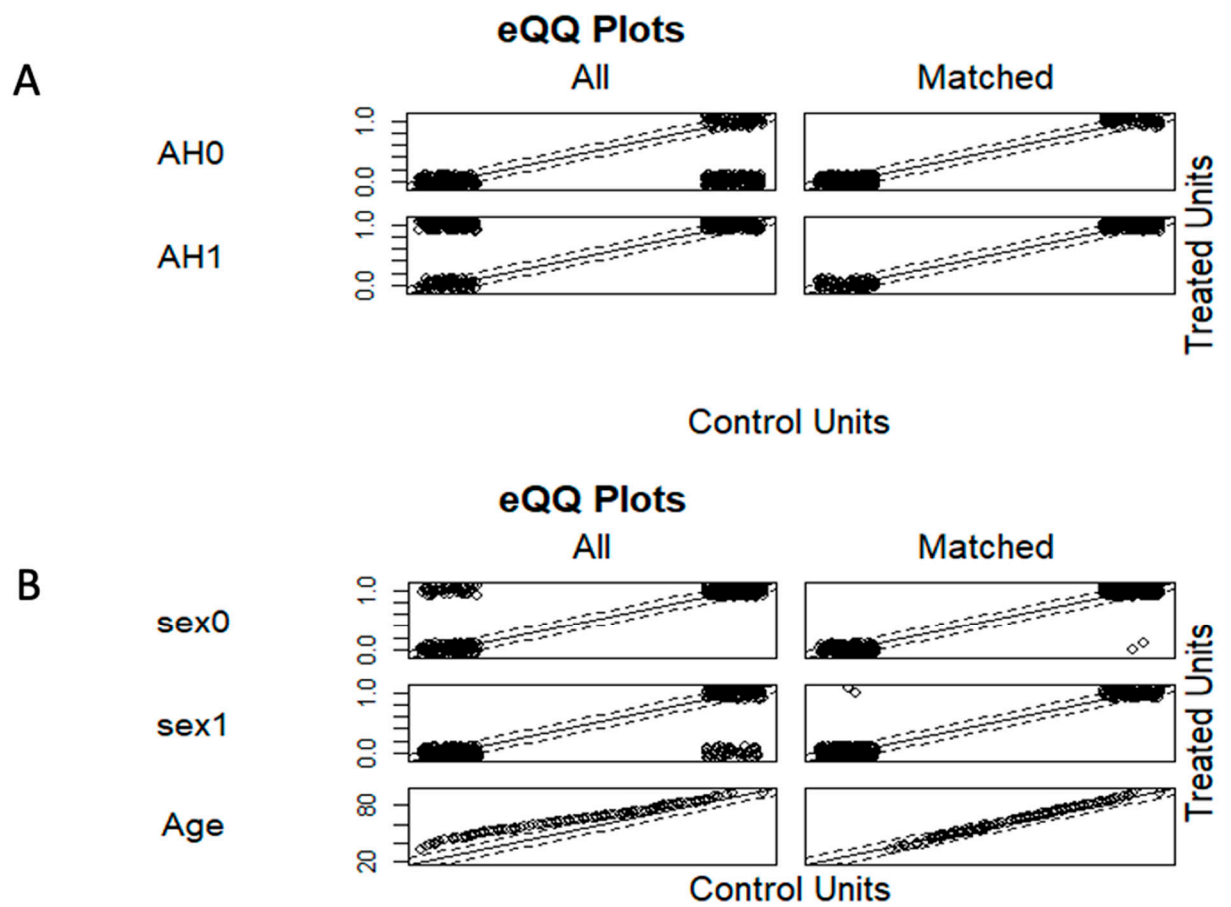

**Supplementary Figure S1.** eQQ Plots confounding characteristics distribution for “Arterial hypertension” confounder: AH0 – “No”, AH1 – “Yes” (A) and for confounders “Age” and “Gender”: sex0 – “female”, sex1 – “male” (B) before and after pseudo-randomization.
